# Supplementary material for: Open and minimally invasive surgery for gastrointestinal stromal tumours: a systematic review and network meta-analysis protocol
Source: HighWire-hosted journal article supplement (doi:10.1136/bmjopen-2021-050414), 2022-02-01
Supplement: bmjopen-2021-050414supp001_data_supplement.pdf [file bmjopen-2021-050414supp001_data_supplement.pdf]

## **Supplementary 1**

### **Search strategy for PubMed**

**1 (gastrointestinal stromal tumor) or (gastrointestinal stromal tumour)**

**or GIST or GISTs**

**2 (open resection) or (open surgery) or laparotomy**

**3 (laparoscop\*) or (laparoscopic surgery)**

**4 (endoscop\*) or (endoscopic surgery)**

**5 (robotic surgery) or (robotic resection)**

**6 (laparoscopic and endoscopic cooperative surgery)**

**7 LECS**

**8 (minimally invasive surgery) or (minimally invasive resection) or**

**(minimally invasive technique)**

**9 #2 or #3 or #4 or #5 or #6 or #7 or #8**

**10 #1 and #9**
